# Supplementary figures and images for: Structural studies near Pevek, Russia: implications for formation of the East Siberian Shelf and Makarov Basin of the Arctic Ocean
Source: Copernicus journal article supplement (doi:10.5194/smsps-4-223-2009), 2009-09-17

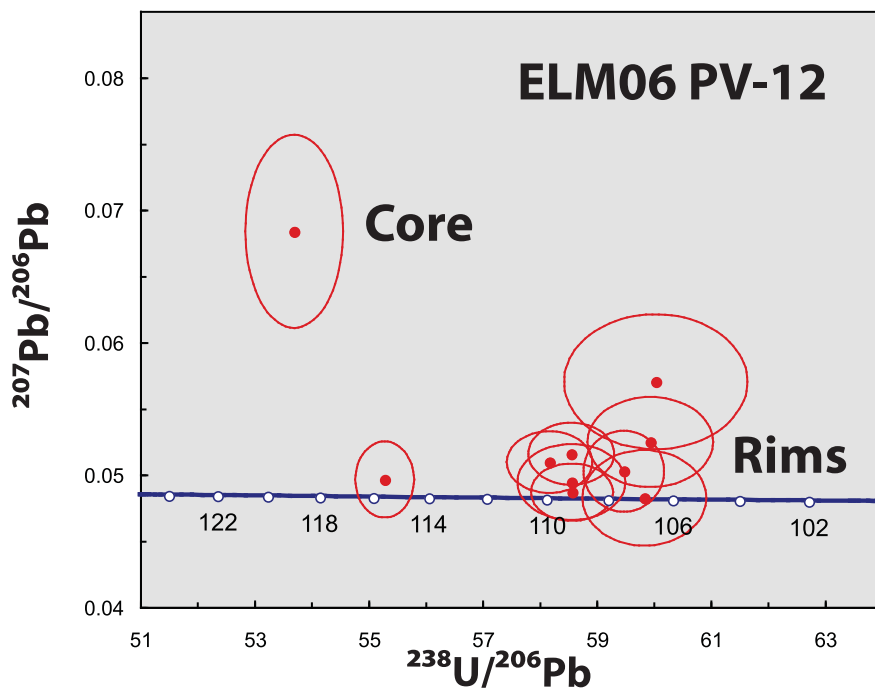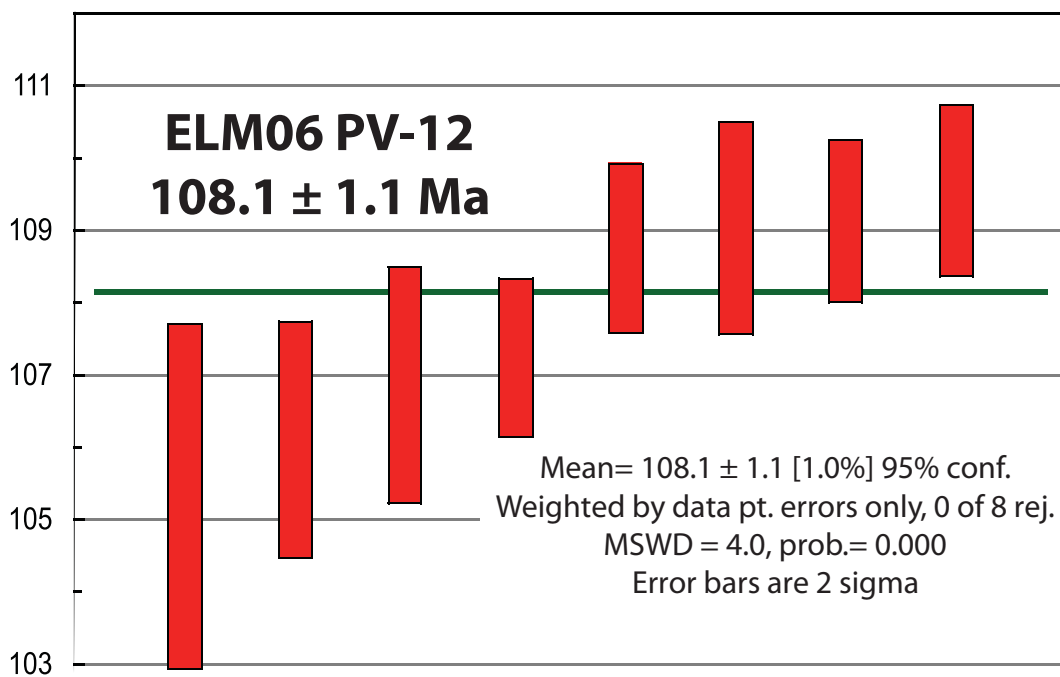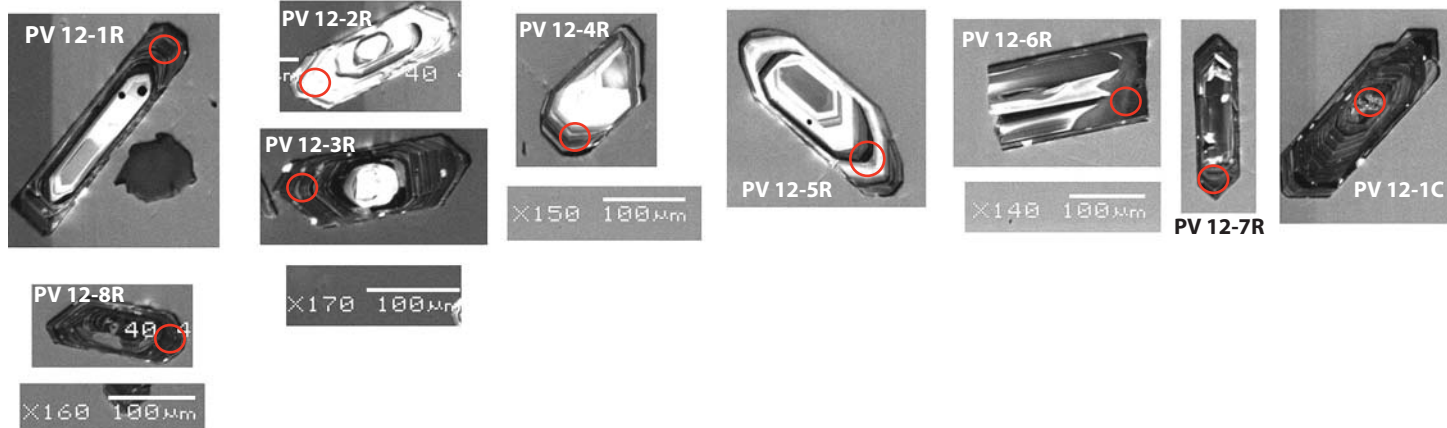

Figure A1. ms-AGU04-spf01 Miller and Verzhbitsky

Supplement: Supplementary file 1 [file smsps-4-223-2009-supplement.zip]
